# Supplementary material for: Ultralight and highly compressible coal oxide-modified graphene aerogels for organic solvent absorption and light-to-heat conversion
Source: Royal Society of Chemistry journal article supplement (doi:10.1039/c9nj05447b), 2019-12-26
Supplement: c9nj05447b6.pdf [file c9nj05447b6.pdf]

## Ultralight and highly compressible coal oxide-modified graphene aerogels for organic solvents absorption and light-to-heat conversion

Shengchao Hou, Yan Lv, Xueyan Wu, Jixi Guo\*, Qingqing Sun, Luxiang Wang,

Dianzeng Jia\*

Key Laboratory of Energy Materials Chemistry, Ministry of Education; Key Laboratory of Advanced Functional Materials, Autonomous Region; Institute of Applied Chemistry, Xinjiang University, Urumqi, 830046, Xinjiang P. R. China.

Email: [jxguo1012@163.com](mailto:jxguo1012@163.com); [jdz@xju.edu.cn](mailto:jdz@xju.edu.cn); Fax: +86-991-8588883; Tel: +86-991-

8583083.

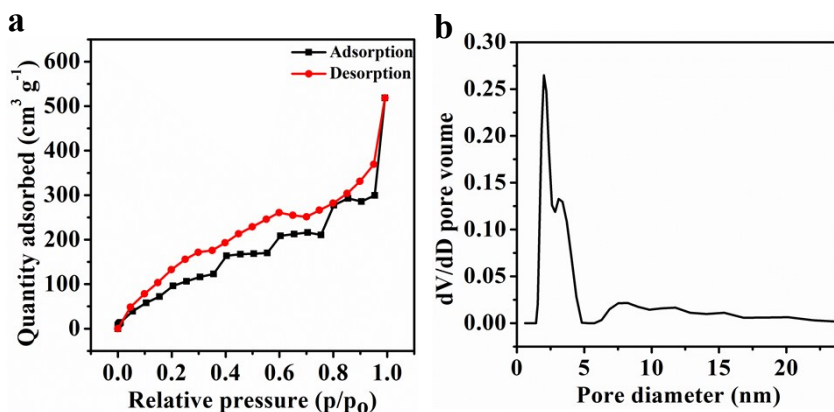

**Figure S1** (a) The nitrogen adsorption and desorption isotherms in Brunauer-Emmett-Teller (BET) measurement, (b) The pore size distribution of MGC.

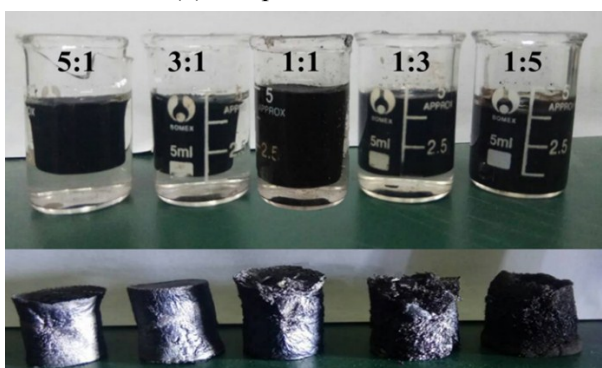

**Figure S2.** The variation in appearance of hydrogels and aerogels with different mass ratios (5:1, 3:1, 1:1, 1:3 and 1:5, respectively; dopamine hydrochloride=6 mg) of GO and CO with the precursor concentration of  $4 \text{ mg cm}^{-3}$ .

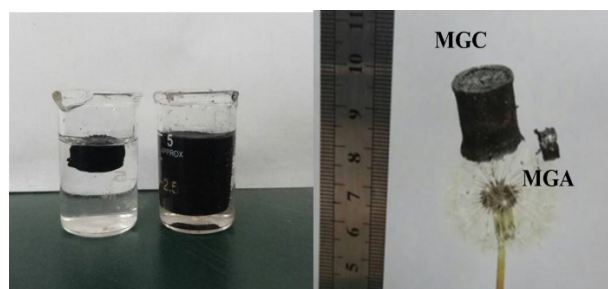

**Figure S3.** The hydrogel appearance of GA and GC with the precursor concentration of  $4 \text{ mg cm}^{-3}$  and photograph of ultralight MGA and MGC samples on dandelion

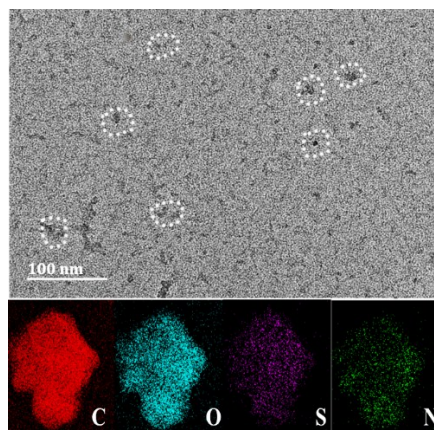

**Figure S4.** TEM images of coal oxide and corresponding elemental mapping.

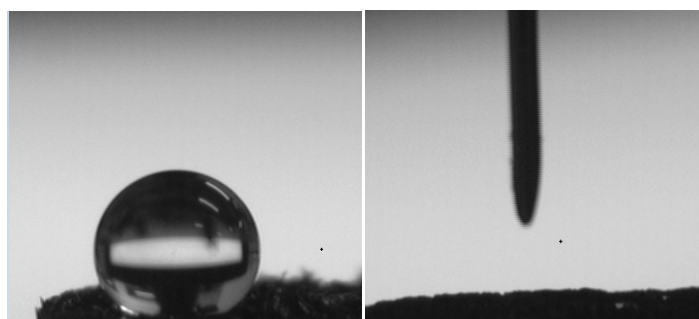

**Figure S5.** Optical image of water droplet and dichloromethane on the surface of the MGC in contact angle measurement.

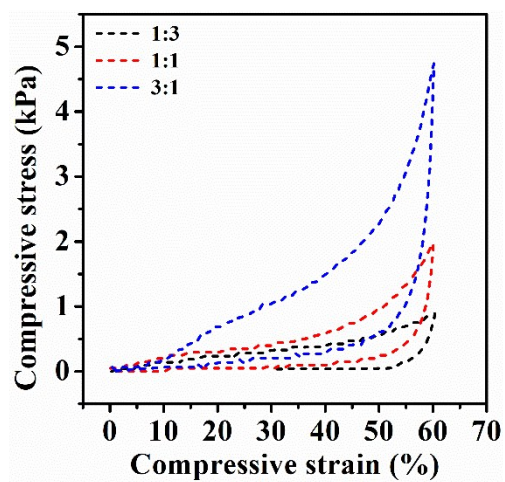

**Figure S6.** Cyclic compression curves of modified aerogels with different CO concentrations.

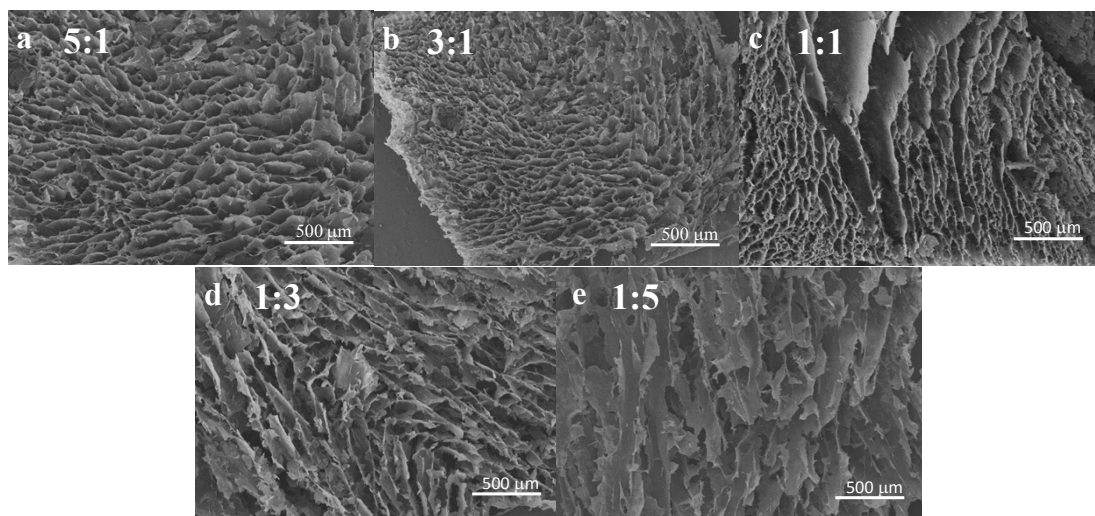

**Figure S7.** The SEM images of the composite aerogels with different feeding ratio of GO and CO, (a) 5:1, (b) 3:1, (c) 1:1, (d) 1:3 and (e) 1:5.

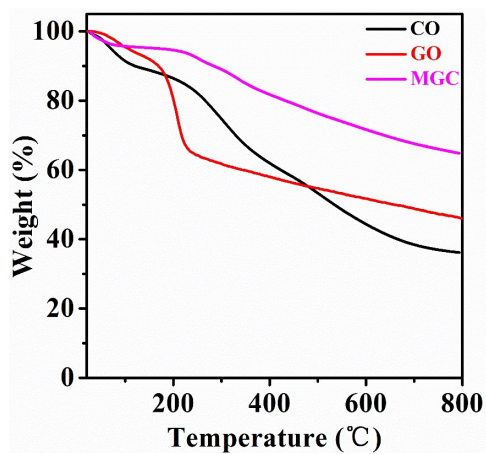

**Figure S8.** TGA curve of MGC performed under an N<sub>2</sub> atmosphere with heating rate of 10 °C min<sup>-1</sup>.

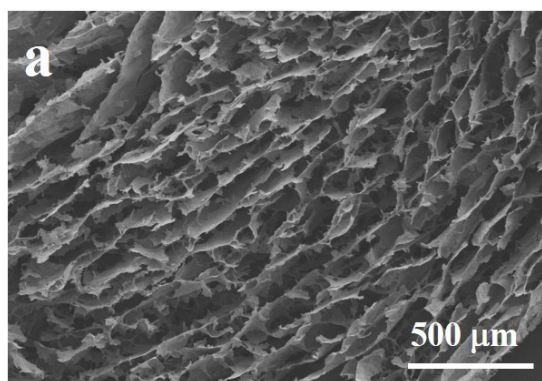

**Figure S9.** SEM images of MGC after oil recycling: (a) combustion method.

**Table S1.** Atom percentage of GC and MGC from XPS survey scans.

|     | C (%) | O (%) | Si (%) | N (%) |
|-----|-------|-------|--------|-------|
| GC  | 57.86 | 38.97 | 0      | 3.17  |
| MGC | 82.56 | 11.33 | 5.28   | 0.83  |

**Table S2.** The proportion of different bonds with Gauss fitted for XPS curves.

|     | GC       |      | MGC      |      |
|-----|----------|------|----------|------|
|     | position | %    | position | %    |
| C-C | 284.88   | 64.9 | 284.78   | 91.6 |
| C-O | 286.28   | 24.8 | 286.28   | 7.5  |
| C=O | 288.68   | 12.3 | 288.68   | 0.9  |

**Table S3.** Comparison of various graphene-based absorbent materials.

| Sorbents                          | Absorbates                | Capacity<br>(g g <sup>-1</sup> ) | Ref. |
|-----------------------------------|---------------------------|----------------------------------|------|
| Graphene sponges                  | Oils and organic solvents | 20–86                            | 42   |
| Graphene aerogels                 | Organic liquids           | 120–200                          | 43   |
| Magnetic graphene foam            | Oil and organic solvents  | 10–27                            | 44   |
| Peanut hull/graphene aerogel      | Oil and organic solvents  | 32–79                            | 8    |
| Nanofiber/graphene aerogel        | Oils absorption           | 120–286                          | 45   |
| Graphene/ cellulose aerogel       | Organic solvents          | 44–265                           | 46   |
| Carbon nanotubes/graphene aerogel | Organic compounds         | 322±8.3                          | 3    |

**Table S4.** Comparison of various bioass-based absorbent materials.

| Sorbents                                | Absorbates                | Capacity<br>(g g <sup>-1</sup> ) | Ref.      |
|-----------------------------------------|---------------------------|----------------------------------|-----------|
| Coal-based fiber                        | Organic matter            | 0.07                             | 12        |
| Melamine/lignin sponges                 | Oil                       | 98–217                           | 47        |
| Lignin-based xerogel                    | Oils and organic solvents | 19–47                            | 48        |
| Cellulose nanofibrils aerogel           | Oil                       | 88–143                           | 49        |
| Twisted carbon fibers                   | Oils and organic solvents | 50–190                           | 11        |
| Bamboo-based aerogel                    | Oils and organic solvents | 30–129                           | 50        |
| sodium alginate foams                   | Oils and organic solvents | 73–187                           | 51        |
| Graphene/coal oxide aerogels            | Oils and organic solvents | 93–196                           | This work |
| Carbonated graphene/coal oxide aerogels | Oils and organic solvents | 170–387                          | This work |
